# Supplementary material for: Solid-state fluorescent materials based on coumarin derivatives: polymorphism, stimuli-responsive emission, self-assembly and optical waveguides
Source: Royal Society of Chemistry journal article supplement (doi:10.1039/c7qm00617a), 2018-01-01
Supplement: c7qm00617a1.pdf [file c7qm00617a1.pdf]

## Supporting Information

# **Solid-State Fluorescent Materials Based on Coumarin Derivatives: Polymorphism, Stimuli-Responsive Emission, Self-Assembly and Optical Waveguides**

Rong Rong Cui,<sup>a</sup> Yuan Chao Lv,<sup>b</sup> Yong Sheng Zhao,<sup>b</sup> Na Zhao<sup>\*a</sup> and Nan Li<sup>\*a</sup>

*<sup>a</sup>Key Laboratory of Macromolecular Science of Shaanxi Province, Key Laboratory of Applied Surface and Colloid Chemistry of Ministry of Education and School of Chemistry & Chemical Engineering, Shaanxi Normal University, Xi'an, 710119, China. E-mail: nzhao@snnu.edu.cn; nli@snnu.edu.cn.*

*<sup>b</sup>Key Laboratory of Photochemistry, Institute of Chemistry, Chinese Academy of Sciences, Beijing 100190, China.*

## Table of Contents

|                                                                                  |    |
|----------------------------------------------------------------------------------|----|
| 1. General Information.....                                                      | 3  |
| 2. Target Compounds Chart.....                                                   | 4  |
| 3. Experimental Procedure and Characterization Data.....                         | 5  |
| 4. Photophysical Properties in Solution.....                                     | 8  |
| 5. PXRD Data.....                                                                | 10 |
| 6. X-ray Single Crystals Data.....                                               | 11 |
| 7. Photoluminescence Properties under Thermal Stimuli.....                       | 13 |
| 8. <sup>1</sup> H NMR analysis of DCA and DCCA under Acidic-Basic Condition..... | 14 |
| 9. Photoluminescence Properties of DCA and DCCA after Self-Assembly.....         | 15 |
| 10. NMR Spectroscopy.....                                                        | 16 |

## 1. General Information

DMF was distilled over  $\text{CaH}_2$ . Petroleum ether and ethyl acetate for chromatography were distilled before used. All other reagents and solvents were used directly from the corresponding supplier without further purification. All starting materials were purchased from Aladdin, Energy, Accela, Tansoole and use directly. Analytical thin-layer chromatography (TLC) was carried out using commercial silica gel plated (GF254). Nuclear magnetic resonance spectra ( $^1\text{H}$ ,  $^{13}\text{C}$  NMR) were recorded on a Bruker Ascend 600 ( $^1\text{H}$  at 600 MHz,  $^{13}\text{C}$  at 151 MHz). The chemical shifts are reported as ppm and solvent residual peaks were shown as following:  $\text{CDCl}_3$   $\delta$  H (7.26 ppm) and  $\delta$  C (77.16 ppm). UV-visible absorption spectra were measured on Purkinje TU-1950 spectrometer. Fluorescence spectra were recorded on a Hitachi F-7000 spectrometer. Fluorescence quantum yields were measured using Hamamatsu C9920-02G. Fluorescence lifetime was measured using Edinburgh FLS980 spectrometer. Single crystal was collected on Oxford diffraction Eos CCD detector or Bruker CMOS PHOTON 100 detector, respectively. Powder X-Ray diffraction (XRD) was performed on a Bruker D8 Advance. The single crystal pictures were taken on Olympus DP80 fluorescent microscopy. High-resolution Mass spectra (HRMS) were obtained on a Bruker Maxis and Microflex and reported as  $m/z$  (relative intensity). Accurate masses are presented as molecular ion  $[\text{M}+\text{Na}]^+$ .

## 2. Target Compounds Charts

| Compound                                                                          |                     |                           |                           | Compound                                                                           |                     |                           |                           |
|-----------------------------------------------------------------------------------|---------------------|---------------------------|---------------------------|------------------------------------------------------------------------------------|---------------------|---------------------------|---------------------------|
| 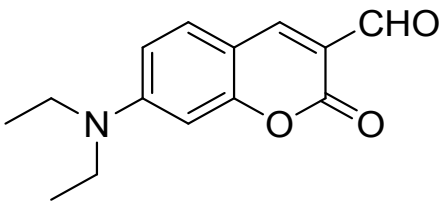 |                     |                           |                           |  |                     |                           |                           |
| <a href="#">Data</a>                                                              | <a href="#">NMR</a> | <a href="#">X-ray (O)</a> | <a href="#">X-ray (R)</a> | <a href="#">Data</a>                                                               | <a href="#">NMR</a> | <a href="#">X-ray (G)</a> | <a href="#">X-ray (R)</a> |

### 3. Experimental Procedure and Characterization Data

#### 3.1 Reaction procedures

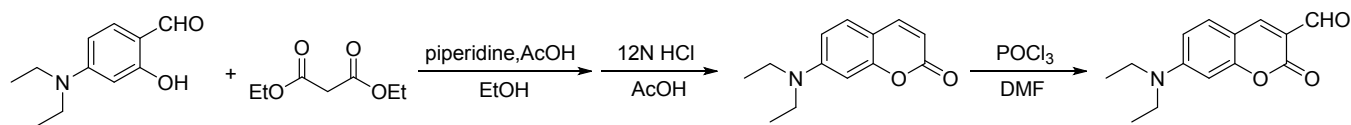

4-(diethylamino)salicylaldehyde (1.93 g, 10.00 mmol), diethyl malonate (3.03 mL, 20.00 mmol), piperidine (1.00 mL) and one drop of AcOH were combined in absolute EtOH (60.00 mL) and refluxed for 6 hours. All volatiles were evaporated under reduced pressure, then concentrated HCl (20.00 mL) and glacial acetic acid (20.00 mL) were added to cyclize, hydrolyze and decarboxylate the intermediate ester while stirring for another 24 hours at reflux. The solution was cooled to room temperature and poured into 100.00 mL of ice water. Then 40% NaOH solution was added dropwise to adjust the pH to 5.0, and a gray precipitate formed immediately. After stirring for 1 hour, the mixture was filtered, washed with water, and dried to give 7-(diethylamino)coumarin in 92% yield.

Freshly distilled DMF (1.60 mL) was added dropwise to POCl<sub>3</sub> (1.60 mL) at 25°C under N<sub>2</sub> atmosphere and stirred for 30 minutes to give a red solution. The solution was added to 7-(diethylamino)coumarin (1.10 g, 5.18 mmol) in 7.50 mL DMF to afford a scarlet suspension. The mixture was stirred at 60 °C for 24 hours and then poured into ice water. NaOH solution was added to adjust the pH to 5.2 to generate an abundant precipitate. The crude product was filtered to give desired product in 60% yield. <sup>1</sup>H NMR (600 MHz, CDCl<sub>3</sub>) δ (ppm): 10.11 (s, 1H, CHO), 8.23 (s, 1H, Ar H), 7.39 (d, 1H, *J* = 9.0 Hz, Ar H), 6.63-6.61 (q, 1H), 6.47 (d, 1H, *J* = 1.9 Hz), 3.48-3.45 (q, 4H, CH<sub>2</sub>), 1.24 (t, 6H, *J* = 7.1 Hz, CH<sub>3</sub>); <sup>13</sup>C-NMR (151 MHz, CDCl<sub>3</sub>) δ (ppm): 187.94, 161.93, 158.99, 153.57, 145.44, 132.60, 114.30, 110.30, 108.28, 97.19, 45.36, 12.53; HRMS (ESI-TOF) *m/z*: [M+Na]<sup>+</sup> calcd for C<sub>14</sub>H<sub>15</sub>NO<sub>3</sub>Na<sup>+</sup>, 268.0944,

found, 268.0948. [Compounds chart](#) [X-ray](#) [NMR](#)

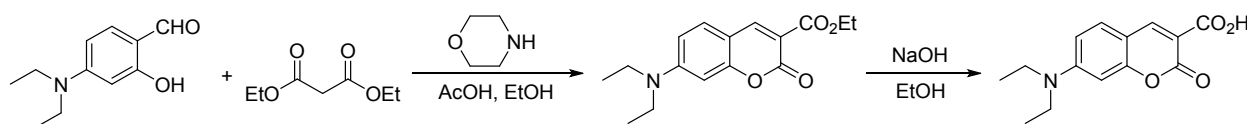

4-(diethylamino)salicylaldehyde (1.93 g, 10.00 mmol) and diethyl malonate (5.20 mL, 34.00 mmol) was dissolved in anhydrous EtOH (50.00 mL). Then a mixture of morpholine (87.00  $\mu$ L, 0.10 mmol) and acetic acid (40.00  $\mu$ L) in 4.00 mL anhydrous EtOH were added to above solution. After stirring at 80°C for 8 hours, the reaction solution was concentrated under reduced pressure. The resulting residue was purified by silica gel column chromatography (petroleum ether/EtOAc = 2 : 1) to give ethyl 7-(diethylamino)coumarin-3-carboxylate in 76% yield.

0.5 M NaOH (20.00 mL) were added to a solution of ethyl 7-(diethylamino)coumarin-3-carboxylate (0.87 g, 3.00 mmol) in EtOH (20.00 mL). After stirring for 12 hours at 25°C, the reaction solution was concentrated under reduced pressure. Hydrochloric acid was then added to adjust the pH to 2.0 and generated an abundant precipitate. The crude product was filtered to give 7-(diethylamino)coumarin-3-carboxylic acid in 60% yield. <sup>1</sup>H NMR (600 MHz, CDCl<sub>3</sub>)  $\delta$  (ppm): 12.32 (s, 1H, COOH), 8.61 (s, 1H, Ar H), 7.43 (d, 1H,  $J$  = 9.0 Hz, Ar H), 6.71-6.69 (m, 1H, Ar H), 6.51 (d, 1H,  $J$  = 2.3 Hz), 3.50-3.46 (q, 4H, CH<sub>2</sub>), 1.26 (t, 6H,  $J$  = 7.1 Hz, CH<sub>3</sub>); <sup>13</sup>C-NMR (151 MHz, CDCl<sub>3</sub>)  $\delta$  (ppm): 165.62, 164.52, 158.11, 153.90, 150.26, 132.03, 111.06, 108.60, 105.48, 96.87, 45.44, 12.47; HRMS (ESI-TOF)  $m/z$ : [M+Na]<sup>+</sup> calcd for C<sub>14</sub>H<sub>15</sub>NO<sub>4</sub>Na<sup>+</sup>, 284.0899, found, 284.0897. [Compounds chart](#) [X-ray](#)

[NMR](#)

### 3.2 Preparation of Micromaterials

The micromaterials were prepared by injecting 100  $\mu\text{L}$  of DCA or DCCA solution ( $3.0 \times 10^{-2}$  M) in THF into 5 mL of ultrasonic water. The aggregated molecules DCA or DCCA occurred in consequence of the change in the solubility. The mixture solution was continually ultrasonic treated for 10 min and sequentially was aged for 9 hours at room temperature. The aged suspensions of microcrystals were transferred onto clean quartz substrates and dried for morphology and spectroscopy measurements.

## 4. Summary of the Optical Properties

Table S1 Optical properties for DCA and DCCA in different solvents at 298K<sup>a</sup>.

| Solvents        | $\Delta f$ | $\lambda_{\text{abs}}$<br>[nm] | $\epsilon$<br>[cm <sup>-1</sup> M <sup>-1</sup> ] | $\lambda_{\text{em}}$ [nm] | $\Delta\nu$<br>[cm <sup>-1</sup> ] | $\Phi_{\text{F}}$ (%) | $\tau_{\text{ave}}$ (ns) |
|-----------------|------------|--------------------------------|---------------------------------------------------|----------------------------|------------------------------------|-----------------------|--------------------------|
| DCA             |            |                                |                                                   |                            |                                    |                       |                          |
| Toluene         | 0.014      | 438                            | 57200                                             | 465                        | 1326                               | 61.8                  | 2.11                     |
| Ethyl acetate   | 0.200      | 438                            | 64500                                             | 478                        | 1910                               | 34.8                  | 1.49                     |
| Tetrahydrofuran | 0.210      | 440                            | 52900                                             | 478                        | 1807                               | 46.0                  | 1.89                     |
| Acetone         | 0.285      | 442                            | 54200                                             | 487                        | 2091                               | 4.5                   | 0.27                     |
| Acetonitrile    | 0.305      | 443                            | 51500                                             | 490                        | 2165                               | 2.7                   | 0.49                     |
| DCCA            |            |                                |                                                   |                            |                                    |                       |                          |
| Toluene         | 0.014      | 424                            | 20300                                             | 450                        | 1362                               | 93.4                  | 3.09                     |
| Ethyl acetate   | 0.200      | 423                            | 44200                                             | 463                        | 2042                               | 13.3                  | 13.90                    |
| Tetrahydrofuran | 0.210      | 424                            | 37300                                             | 466                        | 2126                               | 24.1                  | 0.85                     |
| Acetone         | 0.285      | 427                            | 36900                                             | 474                        | 2322                               | 3.2                   | 20.65                    |
| Acetonitrile    | 0.305      | 429                            | 36700                                             | 476                        | 2302                               | 2.1                   | 16.04                    |

<sup>a</sup>Abbreviation:  $\Delta f$  = solvent polarity parameters,  $\lambda_{\text{abs}}$  = absorption maximum,  $\lambda_{\text{em}}$  = emission maximum,  $\Phi_{\text{F}}$  = solution fluorescence quantum yield estimated by using the calibrated integrating sphere system.



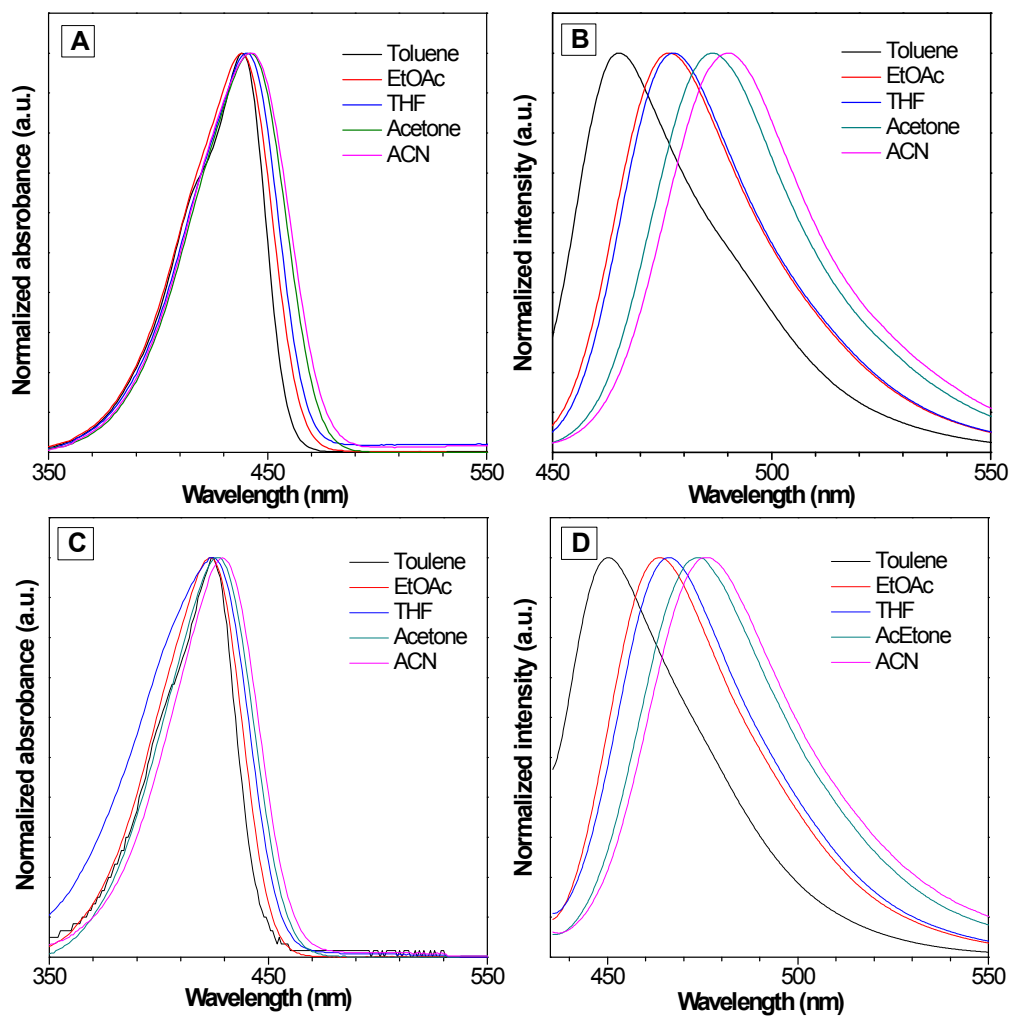

Fig. S1 Normalized absorption spectra of DCA (10  $\mu\text{M}$ ) (A) and DCCA (10  $\mu\text{M}$ ) (C) in different solvents. Normalized PL spectra of DCA (10  $\mu\text{M}$ ) (B) and DCCA (10  $\mu\text{M}$ ) (D) in different solvents.

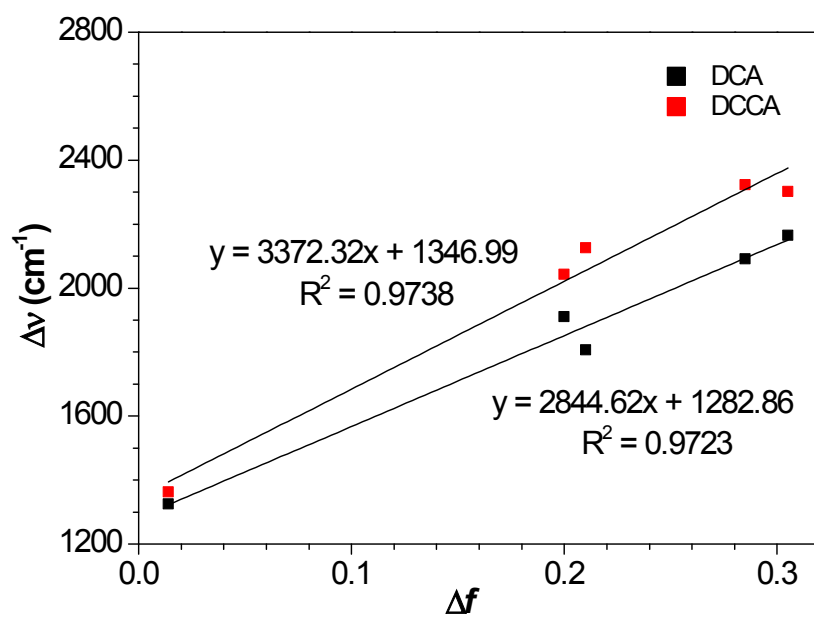

Fig. S2 Lippert-Mataga plot of DCA and DCCA.

## 5. PXRD Data

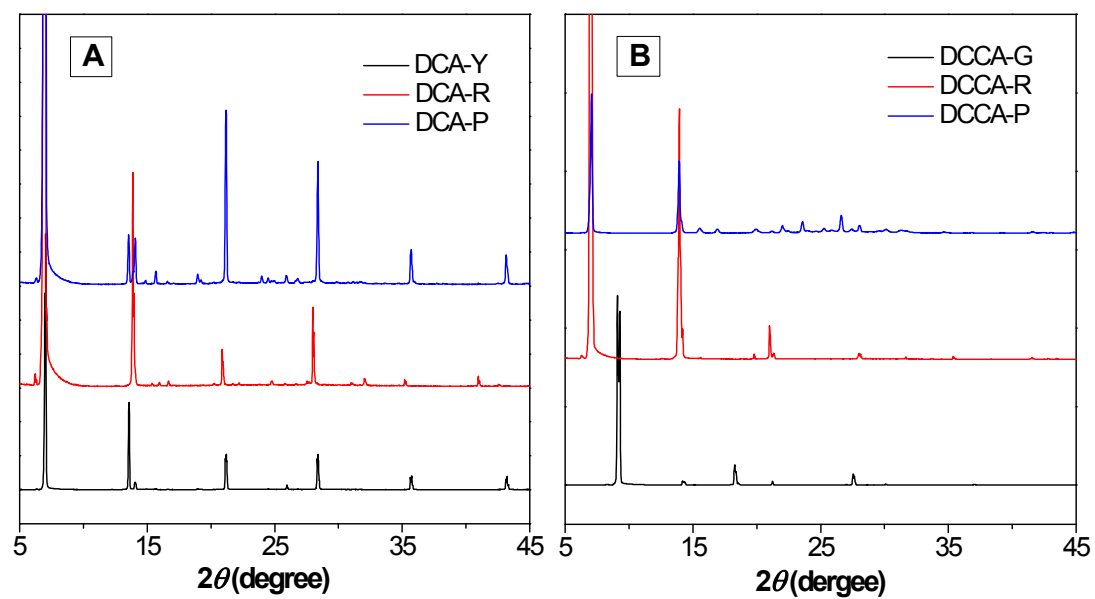

Fig. S3 PXRD of DCA and DCCA under different state.

## 6. X-ray Single Crystals Data

Table S2. Crystallographic data.

| Crystal                                 | DCA-Y <sup>1</sup>                                                                  | DCA-R <sup>2</sup>                                                                  | DCCA-G                                                                                | DCCA-R <sup>3</sup>                                                                   |
|-----------------------------------------|-------------------------------------------------------------------------------------|-------------------------------------------------------------------------------------|---------------------------------------------------------------------------------------|---------------------------------------------------------------------------------------|
| formula                                 | C <sub>14</sub> H <sub>15</sub> NO <sub>3</sub>                                     | C <sub>14</sub> H <sub>15</sub> NO <sub>3</sub>                                     | C <sub>14</sub> H <sub>15</sub> NO <sub>4</sub>                                       | C <sub>14</sub> H <sub>15</sub> NO <sub>4</sub>                                       |
| crystal system                          | triclinic                                                                           | monoclinic                                                                          | triclinic                                                                             | monoclinic                                                                            |
| space group                             | P -1                                                                                | C 1 2/c 1                                                                           | P-1                                                                                   | P2 (1) /c                                                                             |
| <i>a</i> [Å]                            | 7.1186 (4)                                                                          | 25.3417 (9)                                                                         | 5.0788 (3)                                                                            | 14.075 (5)                                                                            |
| <i>b</i> [Å]                            | 7.4835 (5)                                                                          | 7.6890 (3)                                                                          | 10.0610 (7)                                                                           | 7.9101 (15)                                                                           |
| <i>c</i> [Å]                            | 12.5900 (6)                                                                         | 12.5224 (4)                                                                         | 12.9069 (8)                                                                           | 12.694 (3)                                                                            |
| $\beta$ [deg]                           | 85.720 (4)                                                                          | 94.012 (2)                                                                          | 80.914 (5)                                                                            | 116.62 (4)                                                                            |
| <i>V</i> [Å <sup>3</sup> ]              | 613.46 (7)                                                                          | 2434.04 (15)                                                                        | 627.97 (7)                                                                            | 1263.5 (6)                                                                            |
| <i>Z</i>                                | 2                                                                                   | 8                                                                                   | 2                                                                                     | 4                                                                                     |
| $\mu$ [mm <sup>-1</sup> ]               | 0.767                                                                               | 0.094                                                                               | 0.846                                                                                 | 0.841                                                                                 |
| <i>T</i> [K]                            | 293                                                                                 | 153                                                                                 | 293                                                                                   | 293                                                                                   |
| $\theta_{\min}$ - $\theta_{\max}$ [deg] | 0.686-1.000                                                                         | 0.628-0.746                                                                         | 0.756-0.785                                                                           | 0.775-0.817                                                                           |
| <i>R</i>                                | 0.0417                                                                              | 0.0425                                                                              | 0.0539                                                                                | 0.0599                                                                                |
| <i>wR</i> <sub>2</sub>                  | 0.1298                                                                              | 0.1224                                                                              | 0.1811                                                                                | 0.1797                                                                                |
| GOOF                                    | 1.059                                                                               | 1.047                                                                               | 1.074                                                                                 | 1.075                                                                                 |
| crystal pictures <sup>a</sup>           | 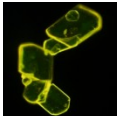 |  |  |  |
|                                         | <a href="#">Compounds chart</a>                                                     |                                                                                     | <a href="#">Compounds chart</a>                                                       |                                                                                       |
|                                         | <a href="#">Data</a>                                                                |                                                                                     | <a href="#">Data</a>                                                                  |                                                                                       |
|                                         | <a href="#">NMR</a>                                                                 |                                                                                     | <a href="#">NMR</a>                                                                   |                                                                                       |

<sup>a</sup> The fluorescent pictures of corresponding single crystals were taken by Olympus DP-80 fluorescence microscopy under UV irradiation.

### References:

1. X. C. Li, L. Yang, X. W. Zhang, L. F. Li, Y. Zhou and Y. A. Son, *Z. Kristallogr.-New Cryst. Struct.*, 2014, **229**, 241.
2. H. D. Li and B. Z. Yin, *Acta Crystallogr., Sect. E: Struct. Rep.*, 2011, **67**, o1713.
3. G. R. Bardajee, M. A. Winnik and A. J. Loung, *Acta Crystallogr., Sect. E: Struct. Rep.*, 2006, **62**, o3076.

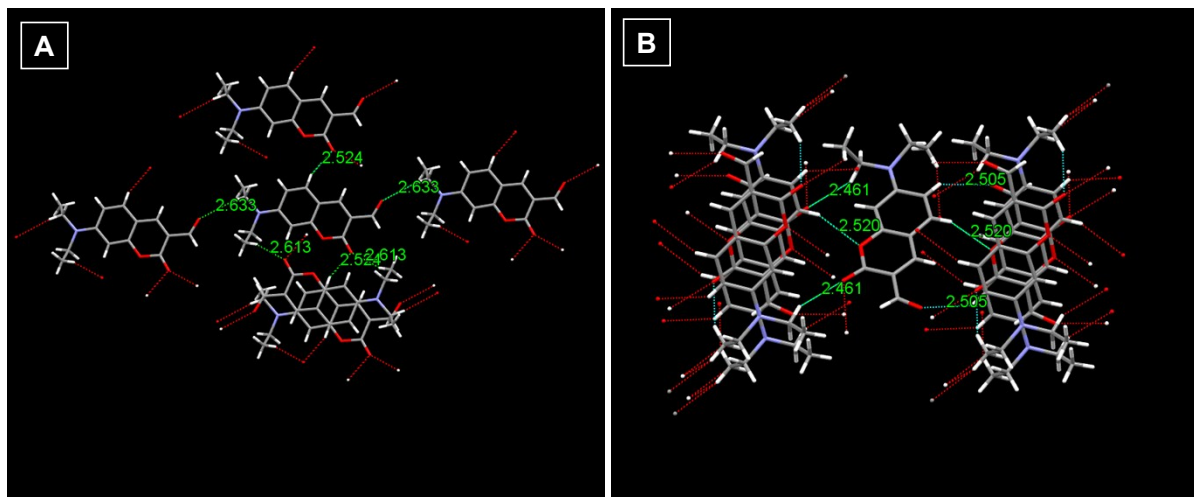

Fig. S4 View of the C-H...O interaction in DCA-Y (A) and DCA-R (B).

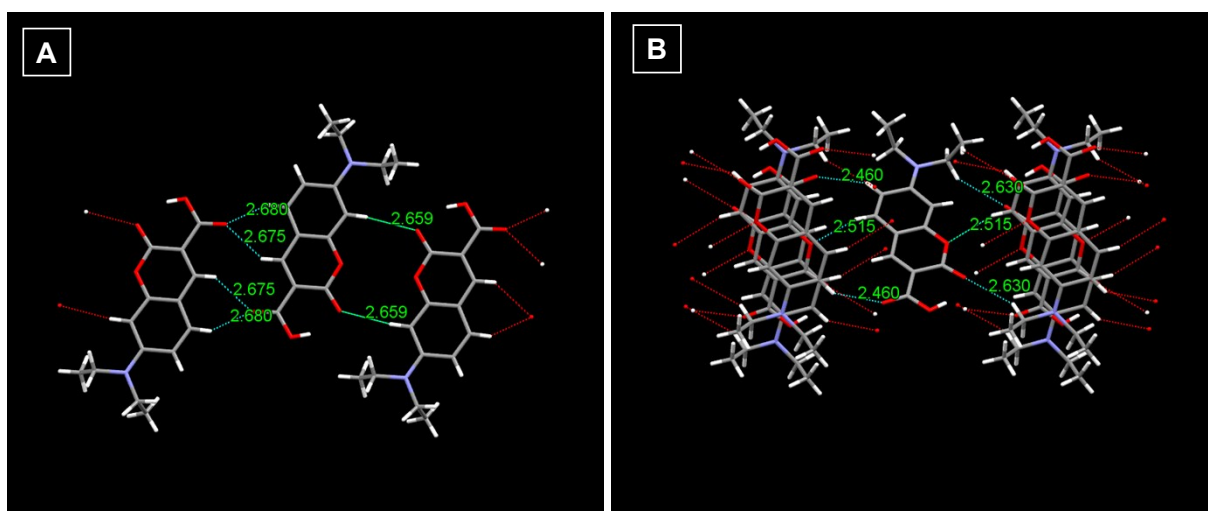

Fig. S5 View of the C-H...O interaction in DCCA-G (A) and DCCA-R (B).

## 7. Photoluminescence Properties under Thermal Stimuli

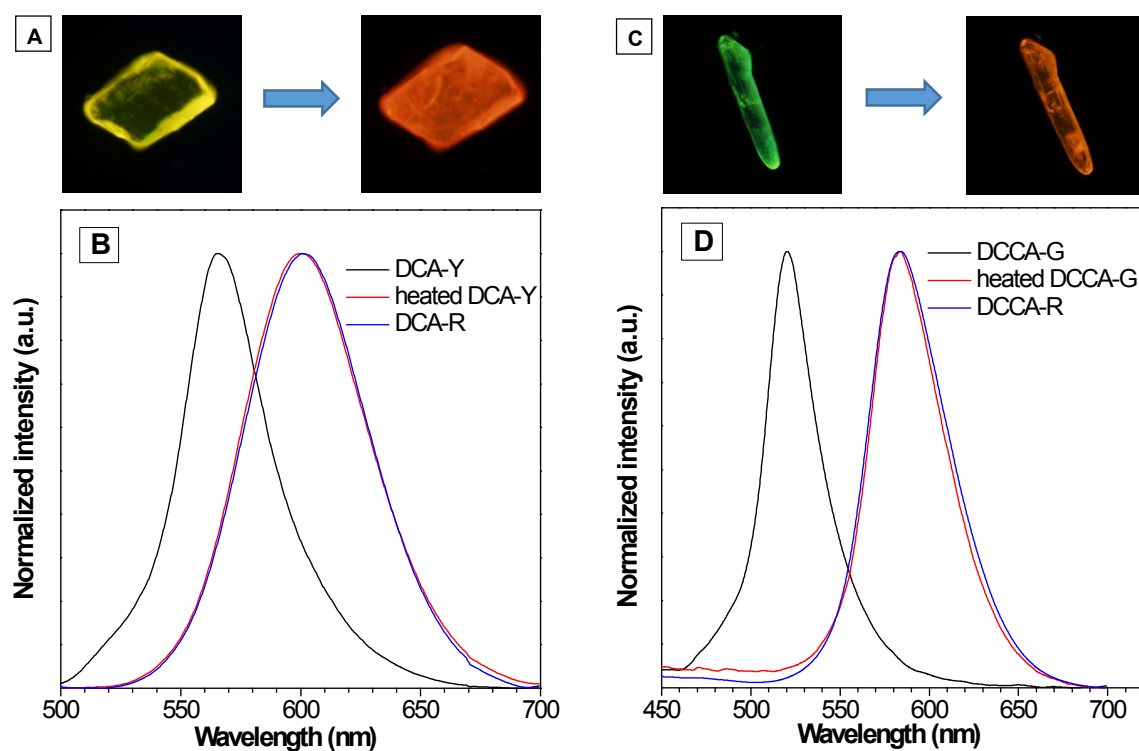

Fig. S6 The photographs of crystal to crystal transformation of DCA-Y into DCA-R (A) and DCCA-G into DCCA-R (C) under the fluorescence microscope. (B) Normalized PL spectra of crystal DCA-Y, heating treated DCA-Y and DCA-R. (D) Normalized PL spectra of crystal DCCA-G, heating treated DCCA-G and DCCA-R.

## 8. $^1\text{H}$ NMR analysis of DCA and DCCA under Acidic-Basic Condition

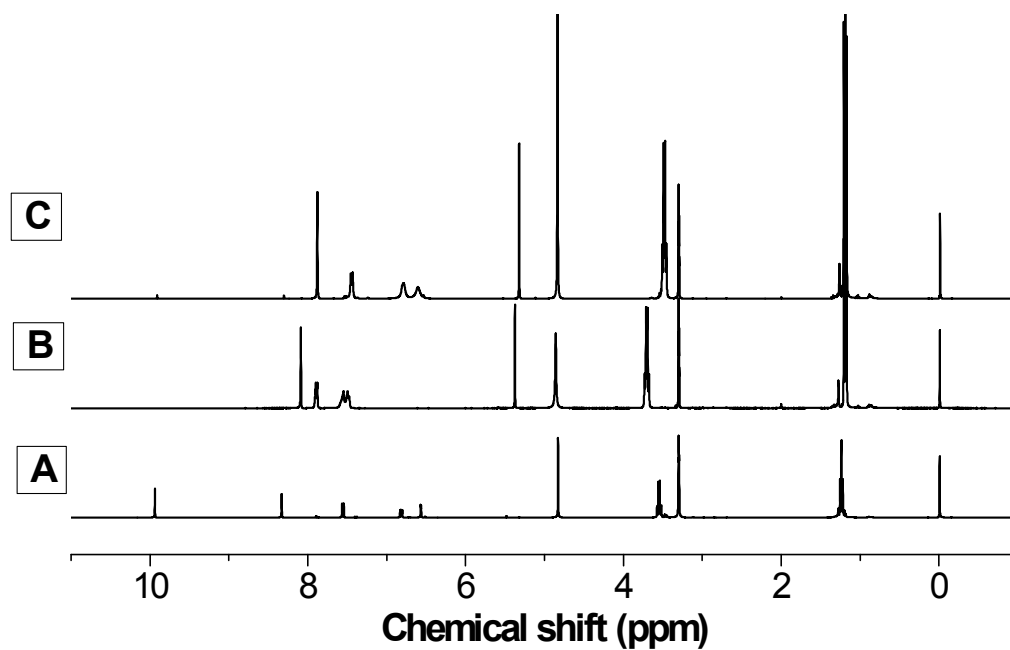

Fig. S7 (A) The  $^1\text{H}$  NMR signal of DCA. (B) The  $^1\text{H}$  NMR signal of DCA after treated with HCl gas. (C) The  $^1\text{H}$  NMR signal of DCA after treated with  $\text{NH}_3$  gas.

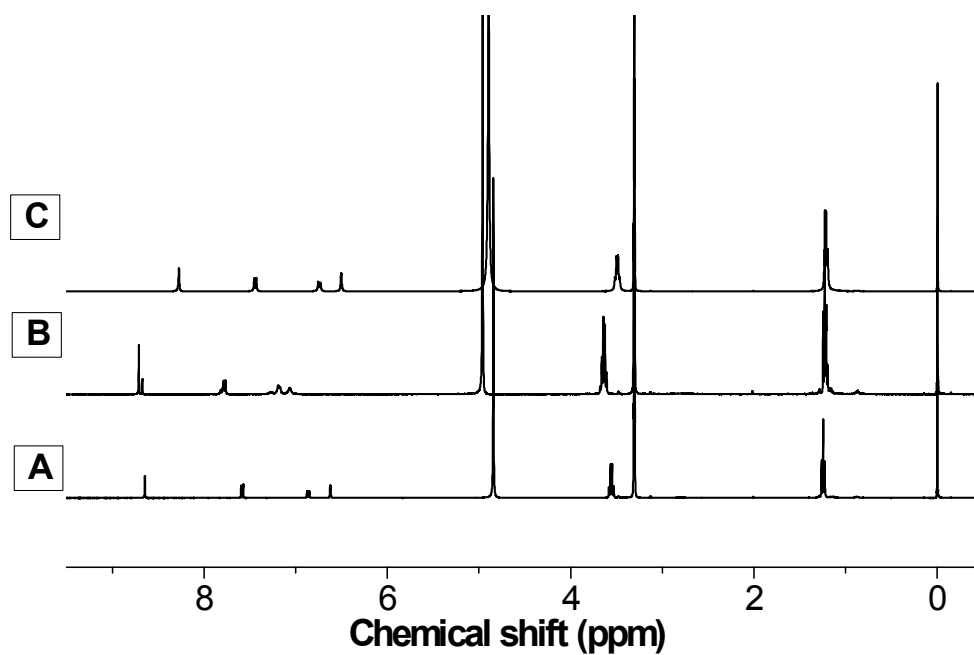

Fig. S8 (A) The  $^1\text{H}$  NMR signal of DCCA. (B) The  $^1\text{H}$  NMR signal of DCCA after treated with HCl gas. (C) The  $^1\text{H}$  NMR signal of DCCA after treated with  $\text{NH}_3$  gas.

## 9. Photoluminescence Properties of DCA and DCCA after Self-Assembly

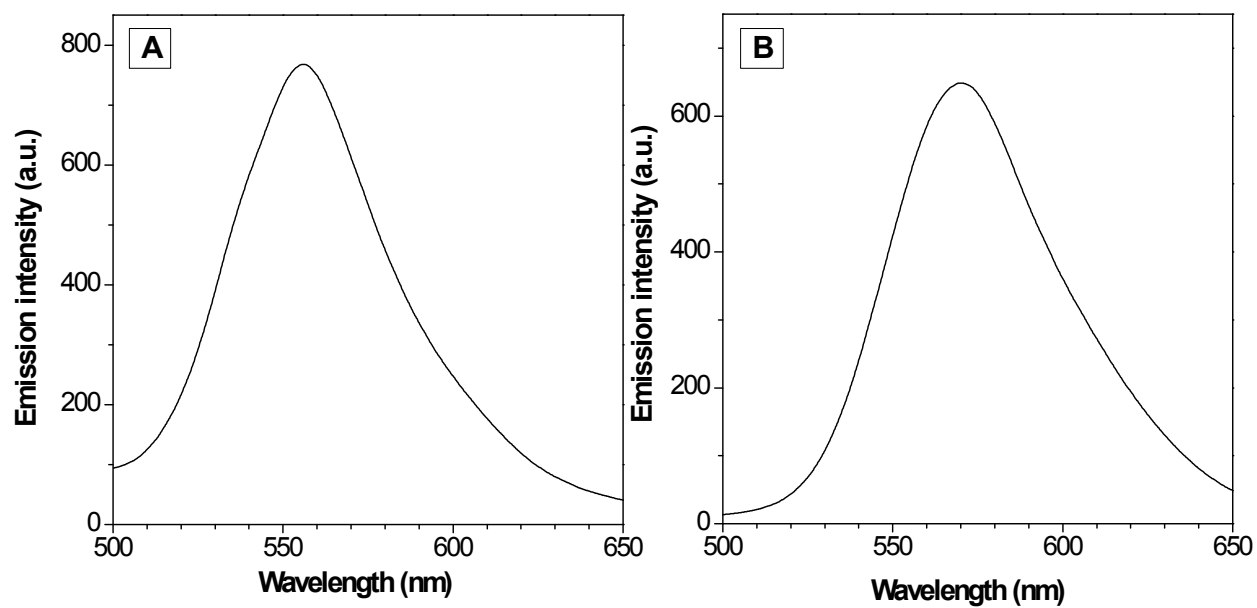

Fig. S9 (A) PL spectra of DCA after self-assembling into ordered structures. (B) PL spectra of DCCA after self-assembling into ordered structures.

## 10. NMR Spectra

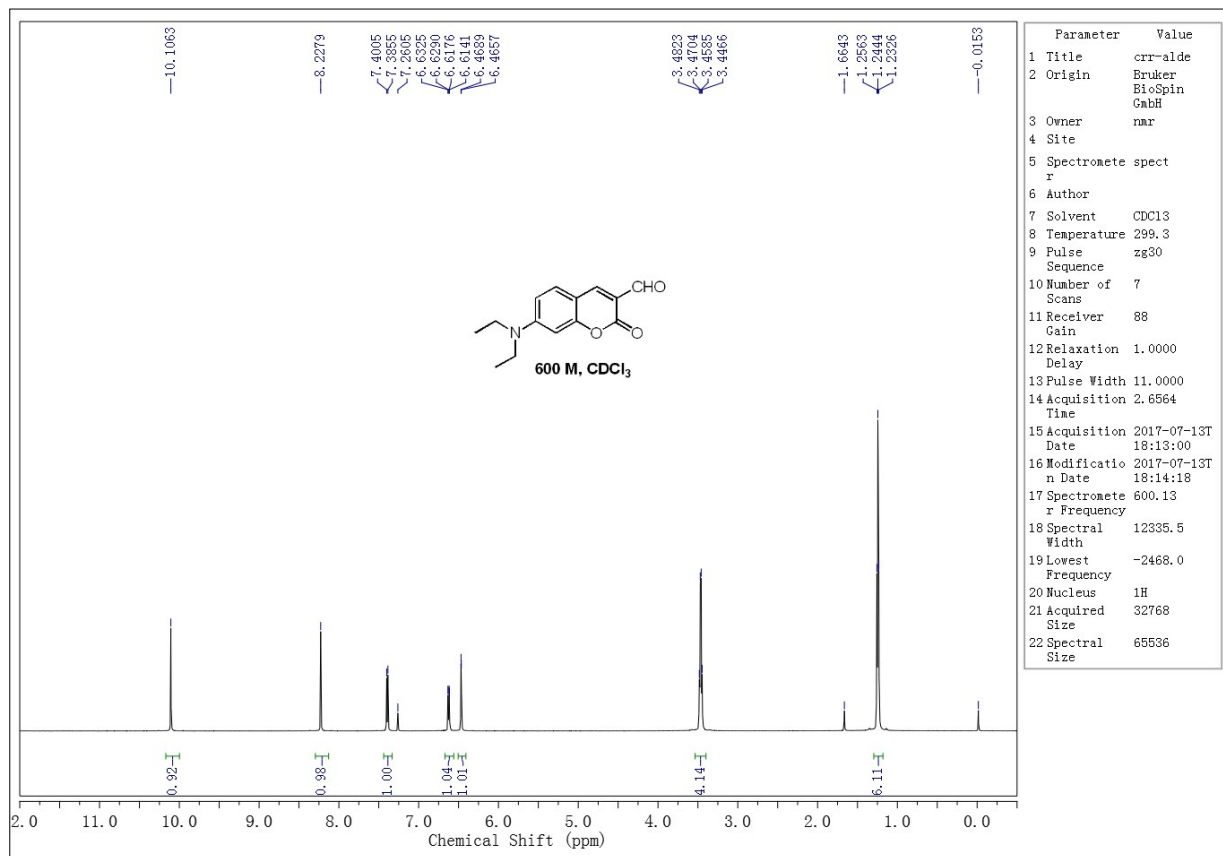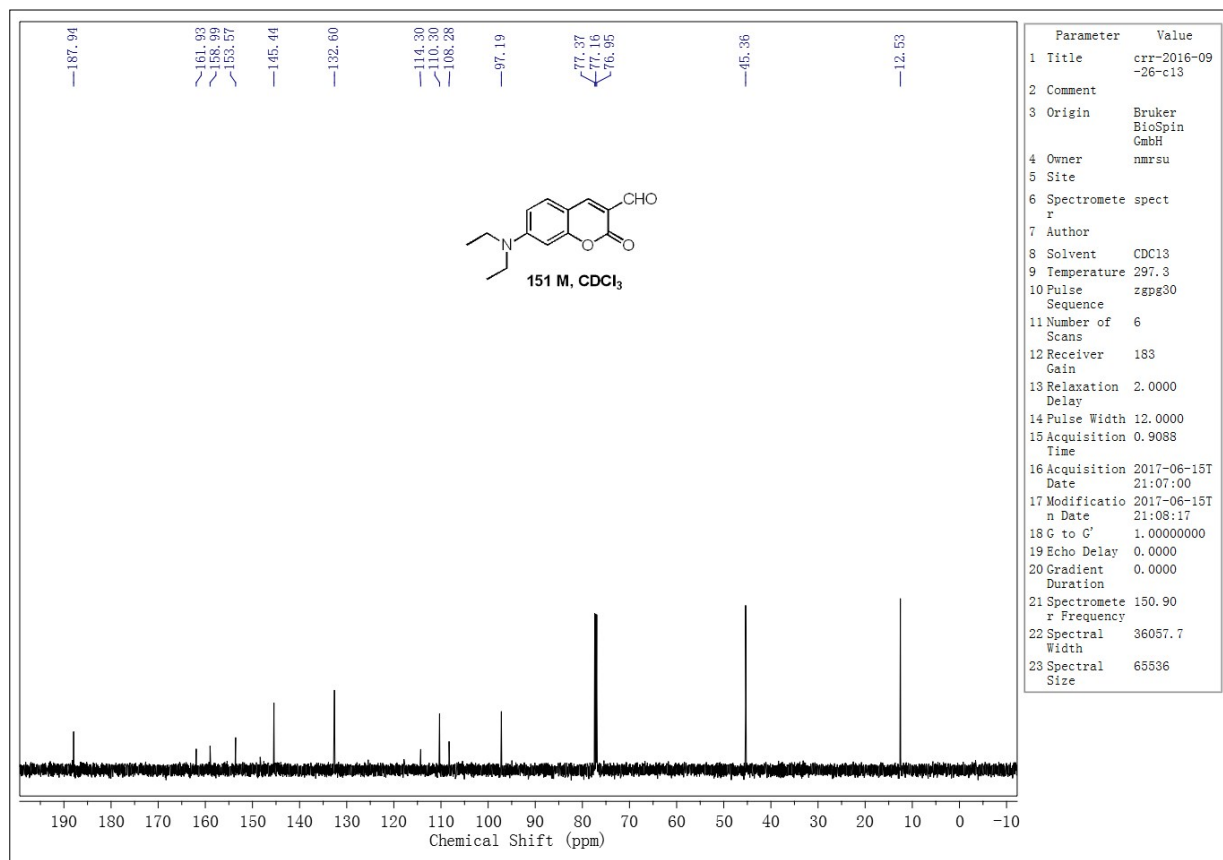

[Compounds chart](#)

[Data](#)

[X-ray](#)



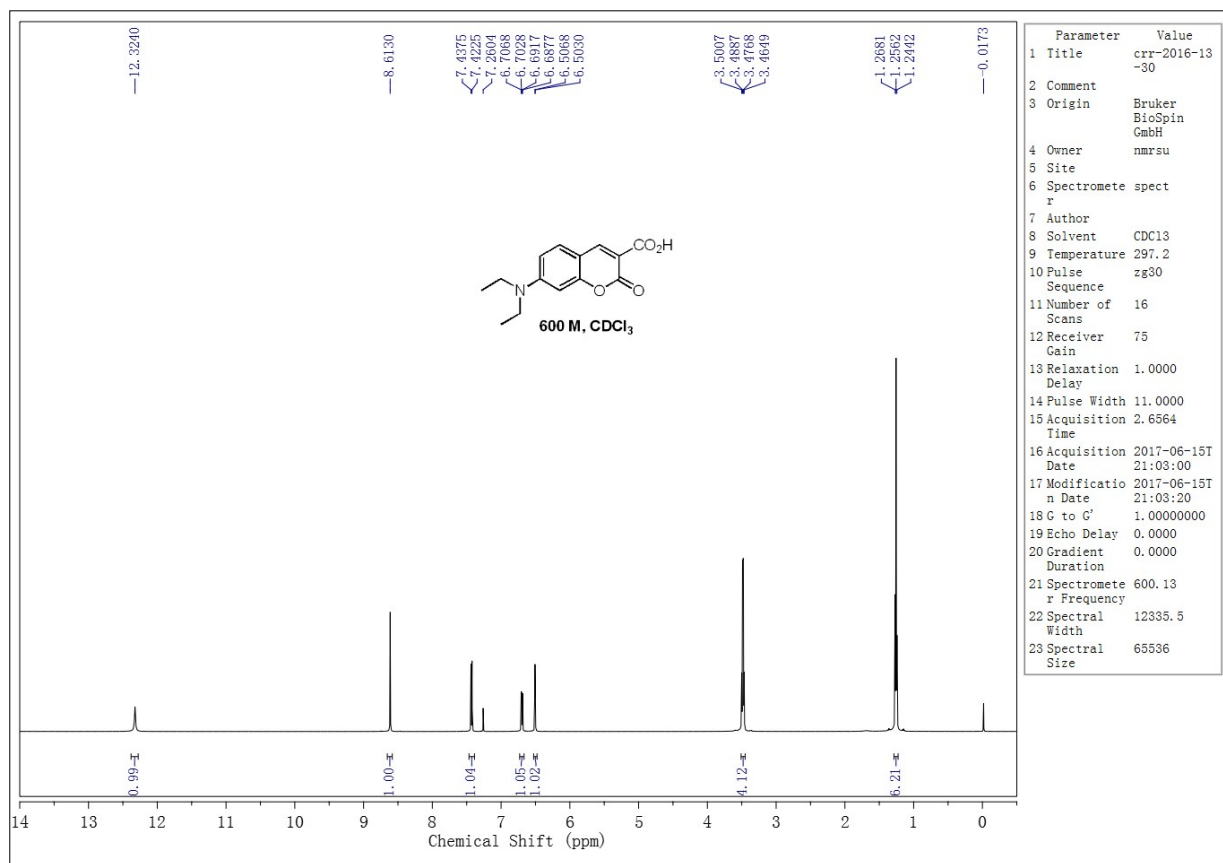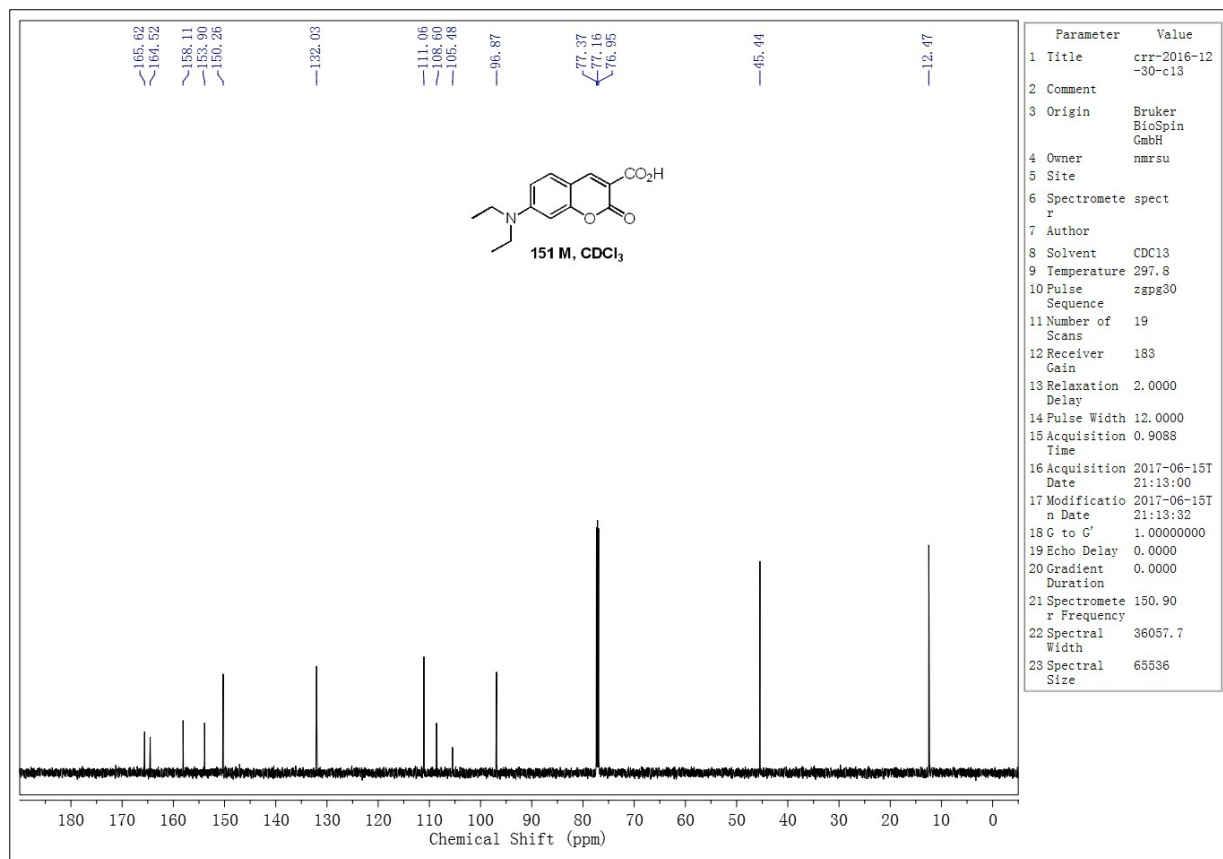

[Compounds chart](#)

[Data](#)

[X-ray](#)
